# Supplementary material
Source: publisher figshare collection journal article supplement (https://karger.figshare.com/ndownloader/files/12525704)
Supplement: Supplementary file 1 [file 12525704]

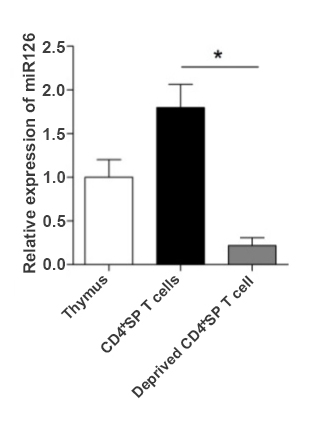


**Suppl. Fig.1. The relative expression of miR-126.**

FVB/N6 mice (4 weeks old, n=6) were sacrificed and thymus tissue was collected. Then, CD4+SP cells were purified by MACS and the relative expression of miR-126 was analyzed by Realtime PCR assay and calculated. * *p<*0.05.
